# Supplementary material for: Enhanced ion transport behaviors in composite polymer electrolyte: the case of a looser chain folding structure
Source: Royal Society of Chemistry journal article supplement (doi:10.1039/d1ta10669d), 2022-01-01
Supplement: d1ta10669d1.pdf [file d1ta10669d1.pdf]

Electronic Supplementary Material (ESI) for Journal of Materials Chemistry A. This journal is © The Royal Society of Chemistry 2021

## Supporting Information

### Enhanced Ion Transport Behaviors in Composite Polymer Electrolyte: the Case of Looser Chain Folding Structure

Dexuan Pei, Rui Ma\*, Gang Yang, Yuhang Li, Can Huang, Ziyang Liu, Shuo Huang, Hongyun Jin\*, Guozhong Cao

Faculty of Materials Science and Chemistry, China University of Geosciences, Wuhan 430074, China

\*Corresponding authors

Email: [ruima@cug.edu.cn](mailto:ruima@cug.edu.cn); [jinhongyun@cug.edu.cn](mailto:jinhongyun@cug.edu.cn)

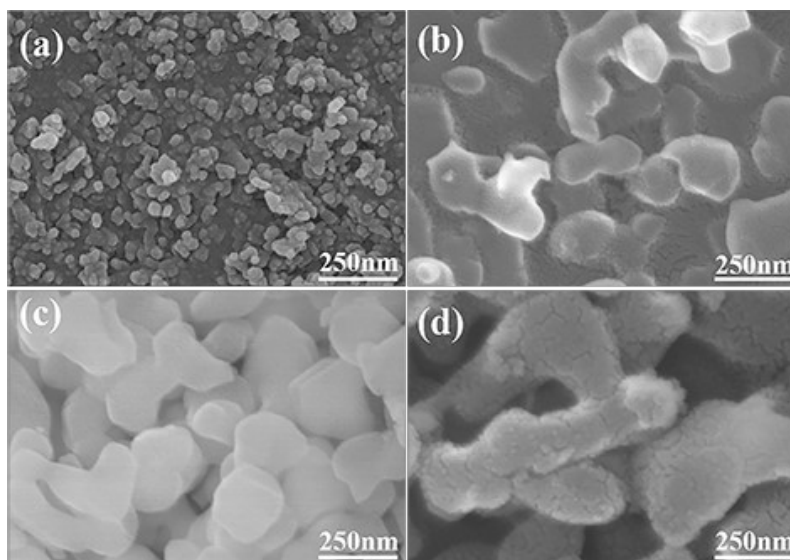

Figure S1. SEM images of Al<sub>2</sub>O<sub>3</sub> particles of (a) 30 nm, (b) 100 nm, (c) 200 nm, and (d) 400 nm

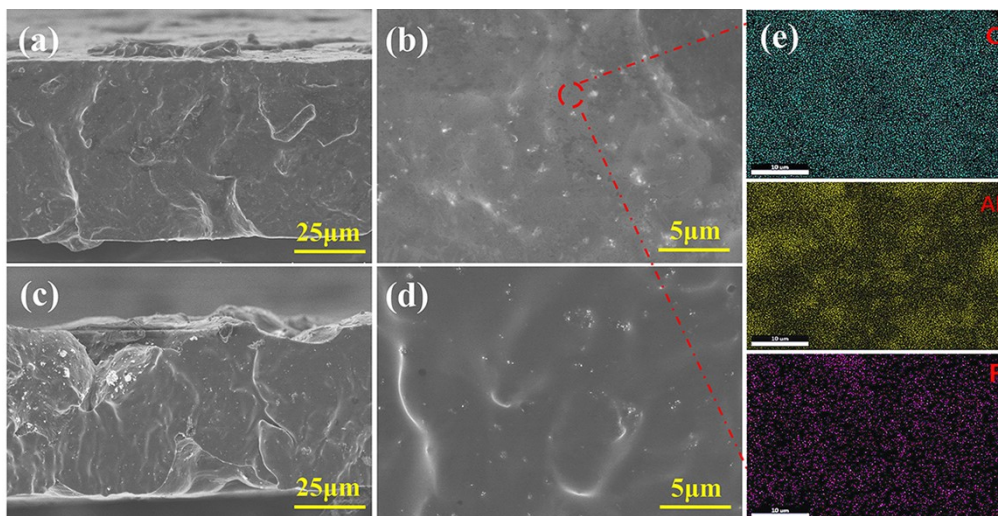

Figure S2. (a, b) Cross-section SEM images of CPEs-30, (c, d) CPEs-200, and (e) EDS mapping of CPEs-30

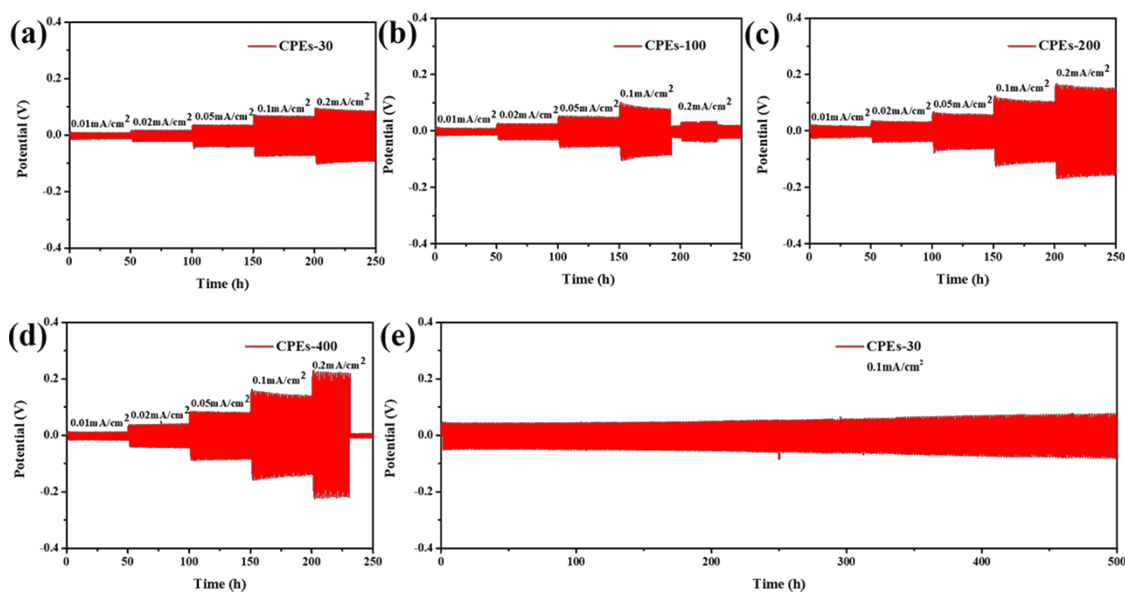

Figure S3. Voltage profile of the lithium plating/stripping cycling in the symmetrical (a) Li/CPEs-30/Li cell, and (b) Li/CPEs-100/Li cell, (c) Li/CPEs-200/Li cell, (d) Li/CPEs-400/Li cell with different current densities, and (e) plating/stripping cycling at 0.1 mA/cm<sup>2</sup> of CPEs-30

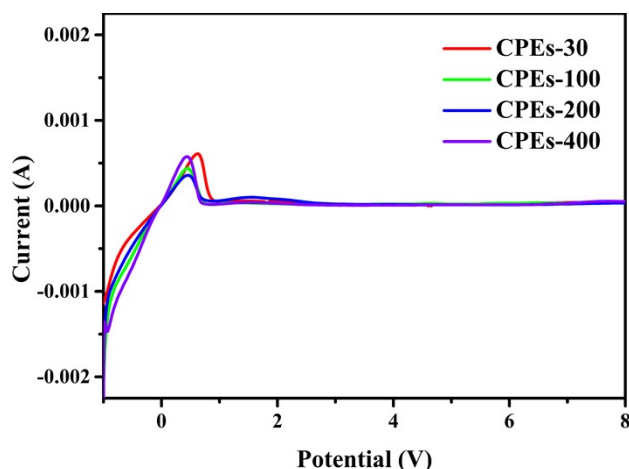

Figure S4. The LSV of CPEs-30, CPEs-100, CPEs-200, and CPEs-400 at  $0.1 \text{ mV s}^{-1}$  from -1 V~8 V in Li//CPEs//Steel cells

Table S1. Electrochemical performances of CPEs with different kinds of ceramic fillers

| Electrolytes                                                     | Cathode/anode    | Capacity(mAh/g) | Cycle Performance         | Year | REF       |
|------------------------------------------------------------------|------------------|-----------------|---------------------------|------|-----------|
| CPEs-30                                                          | LFP/Li           | 118.2 (1 C)     | 81.3% (1 C, 500 cycles)   |      | This work |
| PVDF-HFP-EC-DC/LiPF <sub>6</sub> -Al <sub>2</sub> O <sub>3</sub> | LFP/Li           | 155 (0.5 C)     | 95.6% (0.5 C, 100 cycles) | 2018 | 1         |
| PPC-LiTFSI-Al <sub>2</sub> O <sub>3</sub>                        | NCM622/Li        | 168.9 (0.5 C)   | 90.9% (0.5 C, 100 cycles) | 2021 | 2         |
| PEO-LiClO <sub>4</sub> -SiO <sub>2</sub>                         | LFP/Li           | 120 (1 C)       | 87.5% (1 C, 60 cycles)    | 2016 | 3         |
| PEC-FEC-PTFE-LiTFSI-LiMNT                                        | LFP/Li           | 137.5 (0.5 C)   | 91.9% (0.5 C, 200 cycles) | 2019 | 4         |
| PVDF-HFP-PEG-Al <sub>2</sub> O <sub>3</sub>                      | LFP/Li           | 132.1 (1 C)     | 78.8% (1 C, 500 cycles)   | 2021 | 5         |
| PVDF-HFP-LiClO <sub>4</sub> -LLZO                                | LFP/Li           | 120 (0.5 C)     | 92.5% (0.5 C, 180 cycles) | 2018 | 6         |
| PVDF/PAN/LiTFSI-SN-LiNf@Ga/F-LLZO                                | LMO@T-LNCM811/Li | 112.8 (1 C)     | 89.8% (1 C, 300 cycles)   | 2021 | 7         |
| PEO-LiTFSI-LLZO                                                  | LFP/Li           | 159.3 (0.2 C)   | 84% (0.2 C, 450 cycles)   | 2021 | 8         |
| PEO-LiTFSI-LLZO                                                  | LFP/Li           | 159.9 (0.5 C)   | 97.4% (0.5 C, 70 cycles)  | 2019 | 9         |
| PEO-LiClO <sub>4</sub> -LLZTO                                    | LFP/Li           | 140 (1 C)       | 83% (1 C, 500 cycles)     | 2017 | 10        |
| PVDF-HFP-LiTFSI-                                                 | LFP/Li           | 158.2 (0.5 C)   | 93.2% (0.5 C, 150 cycles) | 2021 | 11        |

LATP

|                          |        |               |                           |      |    |
|--------------------------|--------|---------------|---------------------------|------|----|
| PEO-PVDF-HFP-LITFSI-LATP | LFP/Li | 113.1(0.8 C)  | 86.7% (0.8 C, 500 cycles) | 2020 | 12 |
| PCL-LITFSI-LAGP          | LFP/Li | 157 (0.1 C)   | 96% (0.1 C, 130 cycles)   | 2021 | 13 |
| PEO-LITFSI-LAGP          | LFP/Li | 148.7 (0.3 C) | 93.3 (0.3 C, 300 cycles)  | 2019 | 14 |

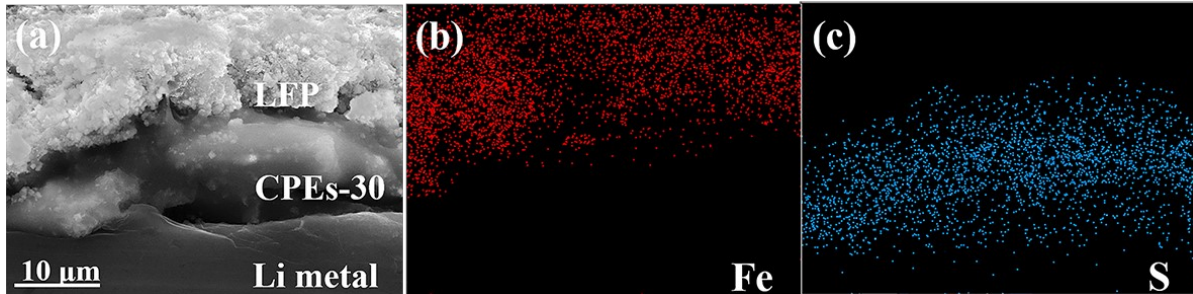

Figure S5. SEM images of cross-section of (a) LFP/CPEs-30/Li cell, and (b, c) EDS mapping of the cross-section

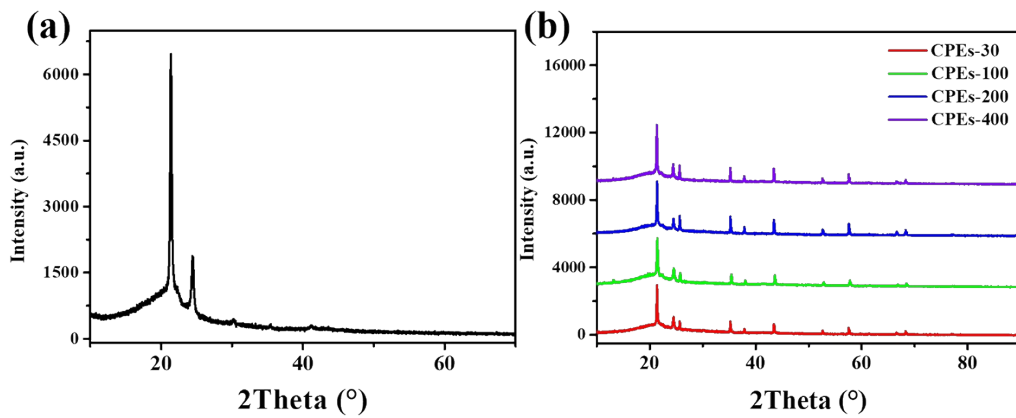

Figure S6. (a) XRD patterns of the pure PCL, (b) XRD patterns of CPEs-30, CPEs-100, CPEs-200, and CPEs-400

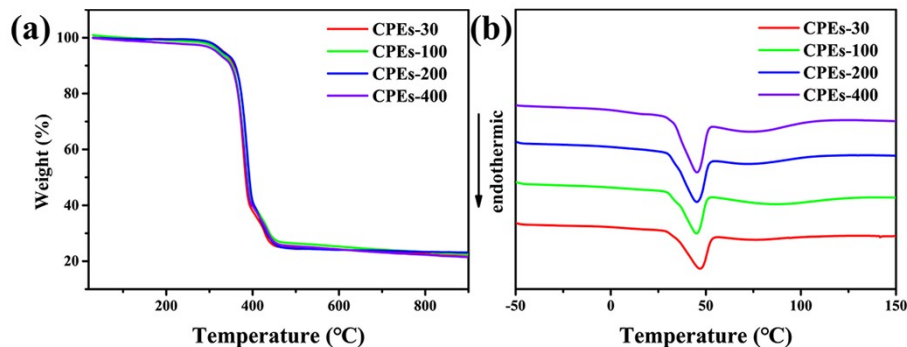

Figure S7. (a) TGA curves of CPEs-30, CPEs-100, CPEs-200, and CPEs-400, and (b) DSC curves of CPEs-30, CPEs-100, CPEs-200, and CPEs-400

Table S2. Thermal properties ( $T_g$ ,  $T_m$ , and  $\Delta H_m$ ) and crystalline ( $\chi_c$ ) of different CPEs obtained from DSC results

| Composite polymer electrolyte | $T_g$ (°C) | $T_m$ (°C) | $\Delta H_m$ (Jg <sup>-1</sup> ) | $\chi_c$ (%) |
|-------------------------------|------------|------------|----------------------------------|--------------|
| CPEs-30                       | -49.21     | 46.71      | 40.84                            | 40.72        |
| CPEs-100                      | -48.64     | 44.85      | 41.47                            | 41.35        |
| CPEs-200                      | -51.20     | 45.01      | 45.44                            | 45.31        |
| CPEs-400                      | -52.13     | 45.14      | 47.13                            | 47.00        |

## References

- 1 S. Ali, C. Tan, M. Waqas, W. Q. Lv, Z. H. Wei, S. H. Wu, B. Boateng, J. N. Liu, J. Ahmed, J. Xiong and J.B. Goodenough, W.D. He, *Adv. Mater. Interfaces*, 2018, 5(5), 1701147.
- 2 X. Y. Hu, M. X. Jing, H. Yang, Q. Y. Liu, F. Chen, W. Y. Yuan, L. Kang, D. H. Li and X. Q. Shen, *J. Colloid Interface Sci*, 2021, 590: 50-59.
- 3 D. C. Lin, W. Liu, Y. Y. Liu, H.R. Lee, P. C. Hsu, K. Liu and Y. Cui, *Nano Lett*, 2016, 16(1), 459-465.
- 4 L. Chen, W. X. Li, L. Z. Fan, C. W. Nan and Q. Zhang, *Adv. Funct. Mater*, 2019, 29(28), 1901047.
- 5 Y. Y. He, Y. Li, Q. S. Tong, J. D. Zhang, J. Z. Weng and M. Q. Zhu, *ACS Appl. Mater. Interfaces*, 2021, 13, 41593-41599.

- 6 W. Q. Zhang, J. H. Nie, F. Li, Z.L. Wang and C. W. Sun, *Nano Energy*, 2018, 45, 413-419.
- 7 K.Z. Walle, L. Musuvadhi Babulal, S.H. Wu, W.C. Chien, R. Jose, S.J. Lue, J.K. Chang and C.C. Yang, *ACS Appl. Mater. Interfaces*, 2021, 13(2), 2507-2520.
- 8 Z. M. Guo, Y. P. Pang, S. X. Xia, F. Xu, J. H. Yang, L. X. Sun and S. Y. Zheng, *Adv. Sci*, 2021, 16, 2100899.
- 9 Z. P. Wan, D. N. Lei, W. Yang, C. Liu, K. Shi, X. G. Hao, L. Shen, W. Lv, B. H. Li, Q. H. Yang, F. Y. Kang and Y. B. He, *Adv. Funct. Mater*, 2019, 29(1), 1805301.
- 10 H. S. Cheng, K. Q. He, Y. Liu, J. W. Zha, K. Ma, R. Lok W. Ma, Z. M. Dang, Robert K.Y. Li and C.Y. Chung, *Electrochim. Acta*, 2017, 430-438.
- 11 H. Chen, C. J. Zhou, X. R. Dong, M. Yan, J. Y. Liang, S. Xin, X. W. Wu, Y. G. Guo and X. X. Zeng, *ACS Appl. Mater. Interfaces*, 2021, 13, 22978-22986.
- 12 X. L. Xue, X. X. Zhang, Y. C. Liu, S. J. Chen, Y. Q. Chen, J. H. Lin and Y. N. Zhang, *Energy Technol*, 2020, 8, 2000444.
- 13 B. H. Zhang, Y. L. Liu, J. Liu, L. Q. Sun, L. N. Cong, F. Fu, A. Mauger, C. M. Julien, H. M. Xie and X. M. Pan, *J. Energy. Chem*, 2021, 52, 318-325.
- 14 X. Wang, H. W. Zhai, B. Y. Qie, Q. Cheng, A. J. Li, J. Borovilas, B. B. Xu, C. M. Shi, T. W. Jin, X. B. Liao, Y. B. Li, X. D. He, S. Y. Du, Y. B. Fu, M. Dontigny, K. Zaghbi and Y. Yang, *Nano Energy*, 2019, 60, 205-212.
